# Supplementary material for: Association between Platelet Count and Treatment Effect of Ticagrelor or Prasugrel in Patients with Acute Coronary Syndromes
Source: PubMed Central journal article supplement — Thromb Haemost. 2023 Jan 18;123(4):464–77. doi: 10.1055/a-1988-5047 (PMC10060058; doi:10.1055/a-1988-5047), 2023-01-18
Supplement: 10-1055-a-1988-5047-s22050249.pdf [file 10-1055-a-1988-5047-s22050249.pdf]

**Supplementary Table S1** Baseline characteristics

| Characteristic                           | Quartile 1<br>(n = 997) | Quartile 2<br>(n = 1,003) | Quartile 3<br>(n = 961) | Quartile 4<br>(n = 982) | p-Value |
|------------------------------------------|-------------------------|---------------------------|-------------------------|-------------------------|---------|
| Mean platelet count × 10 <sup>9</sup> /L | 159 ± 21.9              | 205 ± 10.3                | 241 ± 11.7              | 317 ± 68.6              | <0.001  |
| Age, y                                   | 67.1 ± 11.5             | 64.9 ± 12.3               | 63.6 ± 11.9             | 62.9 ± 12.0             | <0.001  |
| Sex                                      |                         |                           |                         |                         |         |
| Female, no. (%)                          | 129 (12.9)              | 211 (21.0)                | 253 (26.3)              | 345 (35.1)              | <0.001  |
| Diabetes, no. (%)                        | 255 (25.6)              | 219 (21.8)                | 188 (19.6)              | 216/981 (22.0)          | 0.015   |
| Insulin-treated, no. (%)                 | 89 (8.9)                | 60 (6.0)                  | 52 (5.4)                | 71/981 (7.2)            | 0.011   |
| Current smoker, no. (%)                  | 275/991 (27.7)          | 317 (31.6)                | 334/957 (34.9)          | 392/976 (40.2)          | <0.001  |
| Arterial hypertension, no. (%)           | 728/994 (73.2)          | 711 (70.9)                | 647/960 (67.4)          | 682/980 (69.6)          | 0.039   |
| Hypercholesterolemia, no. (%)            | 613/996 (61.5)          | 598/1,002 (59.7)          | 575/959 (60.0)          | 523/979 (53.4)          | 0.001   |
| Prior myocardial infarction, no. (%)     | 199/996 (20.0)          | 169 (16.8)                | 135/959 (14.1)          | 120 (12.2)              | <0.001  |
| Prior PCI, no. (%)                       | 301/996 (30.2)          | 237 (23.6)                | 196/959 (20.4)          | 174 (17.7)              | <0.001  |
| Prior CABG, no. (%)                      | 110/996 (11.0)          | 66 (6.6)                  | 39/960 (4.1)            | 29 (2.9)                | <0.001  |
| Cardiogenic shock, no. (%)               | 17 (1.7)                | 14 (1.4)                  | 15 (1.6)                | 18 (1.8)                | 0.882   |
| Systolic blood pressure, mmHg            | 142 (24.1)              | 144 (24.9)                | 144 (25.3)              | 143 (24.5)              | 0.247   |
| Diastolic blood pressure, mmHg           | 80.8 (13.8)             | 82.1 (14.3)               | 82.4 (14.2)             | 82.2 (14.3)             | 0.054   |
| Heart rate, beats/min                    | 74.8 (15.8)             | 75.5 (15.1)               | 76.7 (15.1)             | 78.8 (16.5)             | <0.001  |
| Body mass index, kg/m <sup>2</sup>       | 28.0 (4.35)             | 27.9 (4.52)               | 27.7 (4.30)             | 27.6 (4.84)             | 0.147   |
| Weight <60 kg, no. (%)                   | 29 (2.9)                | 54 (5.4)                  | 45 (4.7)                | 69 (7.1)                | <0.001  |
| Creatinine, μmol/L                       | 92.7 (31.1)             | 89.8 (31.5)               | 86.1 (25.1)             | 83.3 (26.1)             | <0.001  |
| Diagnosis at admission                   |                         |                           |                         |                         |         |
| Unstable angina, no. (%)                 | 163 (16.3)              | 141 (14.1)                | 119 (12.4)              | 84 (8.6)                | <0.001  |
| NSTEMI, no. (%)                          | 484 (48.5)              | 475 (47.4)                | 435 (45.3)              | 452 (46.0)              |         |
| STEMI, no. (%)                           | 350 (35.1)              | 387 (38.6)                | 407 (42.4)              | 446 (45.4)              |         |
| Coronary angiography, no. (%)            | 994 (99.7)              | 1000 (99.7)               | 958 (99.7)              | 977 (99.5)              | 0.880   |
| Treatment strategy, no. (%)              |                         |                           |                         |                         |         |
| PCI                                      | 816 (81.9)              | 822 (82.0)                | 816 (85.0)              | 851 (86.8)              | 0.028   |
| CABG                                     | 26 (2.6)                | 19 (1.9)                  | 20 (2.1)                | 18 (1.8)                |         |
| Conservative                             | 154 (15.5)              | 161 (16.1)                | 124 (12.9)              | 111 (11.3)              |         |

Abbreviations: CABG, coronary artery bypass grafting; NSTEMI, non-ST-elevation myocardial infarction; PCI, percutaneous coronary intervention; STEMI, ST-elevation myocardial infarction.

Note: Data are mean ± standard deviation or counts (%).

Missing continuous data:

Quartile 1 group: systolic blood pressure: 2 patients, diastolic blood pressure: 4 patients, heart rate: 1 patient, body mass index: 12 patients.

Quartile 2 group: systolic blood pressure: 1 patient, diastolic blood pressure: 5 patients, body mass index: 5 patients.

Quartile 3 group: body mass index: 7 patients.

Quartile 4 group: diastolic blood pressure: 2 patients, heart rate: 1 patient, body mass index: 7 patients.

The remaining continuous data were complete.

**Supplementary Table S2** Angiographic and procedural characteristics

| Characteristic                                  | Quartile 1<br>(n = 994) | Quartile 2<br>(n = 1,000) | Quartile 3<br>(n = 958) | Quartile 4<br>(n = 977) | p-Value |
|-------------------------------------------------|-------------------------|---------------------------|-------------------------|-------------------------|---------|
| Access site                                     |                         |                           |                         |                         |         |
| Femoral artery                                  | 619 (62.3)              | 635 (63.5)                | 601 (62.7)              | 620 (63.5)              | 0.999   |
| Radial artery                                   | 370 (37.2)              | 360 (36.0)                | 352 (36.7)              | 353 (36.1)              |         |
| Other                                           | 5 (0.5)                 | 5 (0.5)                   | 5 (0.5)                 | 4 (0.4)                 |         |
| Number of diseased coronary arteries            |                         |                           |                         |                         |         |
| No obstructive CAD                              | 83 (8.4)                | 89 (8.9)                  | 82 (8.6)                | 79 (8.1)                | 0.013   |
| One-vessel disease                              | 255 (25.7)              | 297 (29.7)                | 295 (30.8)              | 309 (31.6)              |         |
| Two-vessel disease                              | 250 (25.2)              | 266 (26.6)                | 260 (27.1)              | 273 (27.9)              |         |
| Three-vessel disease                            | 406 (40.8)              | 348 (34.8)                | 321 (33.5)              | 316 (32.3)              |         |
| Left ventricular ejection fraction <sup>a</sup> | 51.3 ± 11.4             | 52.1 ± 11.0               | 52.4 ± 10.9             | 51.3 ± 11.6             | 0.090   |

Abbreviation: CAD, coronary artery disease.

Note: Data are shown as counts (proportion; %) or mean ± standard deviation. Angiographic data were not available for 3 patients in the quartile 1 group, 3 patients in the quartile 2 group, 3 patients in the quartile 3 group, and 5 patients in the quartile 4 group.

<sup>a</sup>Left ventricular ejection fraction was not available in 69 patients in the quartile 1 group, 63 patients in the quartile 2 group, 44 patients in the quartile 3 group, and 43 patients in the quartile 4 group.

**Supplementary Table S3** Procedural characteristics

| Characteristic                           | Quartile 1<br>(n = 816) | Quartile 2<br>(n = 822) | Quartile 3<br>(n = 816) | Quartile 4<br>(n = 851) | p-Value |
|------------------------------------------|-------------------------|-------------------------|-------------------------|-------------------------|---------|
| Target vessel                            |                         |                         |                         |                         |         |
| Left main coronary artery                | 19 (2.3)                | 17 (2.1)                | 18 (2.2)                | 20 (2.4)                | 0.285   |
| LAD coronary artery                      | 343 (42.0)              | 344 (41.8)              | 368 (45.1)              | 374 (43.9)              |         |
| Left circumflex coronary artery          | 171 (21.0)              | 174 (21.2)              | 159 (19.5)              | 176 (20.7)              |         |
| Right coronary artery                    | 258 (31.6)              | 275 (33.5)              | 257 (31.5)              | 273 (32.1)              |         |
| Bypass graft                             | 25 (3.1)                | 12 (1.5)                | 14 (1.7)                | 8 (0.9)                 |         |
| Complex lesion (type B2/C)               | 465 (57.0)              | 512 (62.3)              | 475 (58.2)              | 495 (58.2)              | 0.140   |
| More than 1 lesion treated               | 285 (34.9)              | 272 (33.1)              | 300 (36.8)              | 292 (34.3)              | 0.468   |
| TIMI flow grade before the intervention  |                         |                         |                         |                         |         |
| 0                                        | 261 (32.0)              | 300 (36.5)              | 263 (32.2)              | 323 (38.0)              | 0.094   |
| 1                                        | 65 (8.0)                | 76 (9.3)                | 62 (7.6)                | 74 (8.7)                |         |
| 2                                        | 182 (22.3)              | 176 (21.4)              | 194 (23.8)              | 180 (21.2)              |         |
| 3                                        | 308 (37.7)              | 270 (32.8)              | 297 (36.4)              | 274 (32.2)              |         |
| TIMI flow grade after the intervention   |                         |                         |                         |                         |         |
| 0                                        | 12 (1.5)                | 4 (0.5)                 | 6 (0.7)                 | 10 (1.2)                | 0.533   |
| 1                                        | 4 (0.5)                 | 5 (0.6)                 | 2 (0.3)                 | 5 (0.6)                 |         |
| 2                                        | 24 (2.9)                | 20 (2.4)                | 23 (2.8)                | 17 (2.0)                |         |
| 3                                        | 776 (95.1)              | 793 (96.5)              | 785 (96.2)              | 819 (96.2)              |         |
| Type of intervention                     |                         |                         |                         |                         |         |
| Drug-eluting stent                       | 733 (89.8)              | 737 (89.7)              | 745 (91.3)              | 766 (90.0)              | 0.671   |
| Bare-metal stent                         | 2 (0.3)                 | 4 (0.5)                 | 0 (0.0)                 | 6 (0.7)                 | 0.067   |
| Bioresorbable vascular scaffold          | 41 (5.0)                | 54 (6.6)                | 44 (5.4)                | 47 (5.5)                | 0.565   |
| Drug-eluting balloon                     | 22 (2.7)                | 9 (1.1)                 | 16 (2.0)                | 14 (1.7)                | 0.109   |
| Plain balloon angioplasty                | 26 (3.2)                | 22 (2.7)                | 22 (2.7)                | 28 (3.3)                | 0.827   |
| Maximal stent diameter (mm)              | 3.2 (0.5)               | 3.2 (0.5)               | 3.2 (0.5)               | 3.2 (0.5)               | 0.176   |
| Total stented length (mm)                | 30.8 (18.0)             | 31.0 (17.6)             | 30.1 (15.9)             | 30.3 (16.2)             | 0.676   |
| Successful PCI                           | 797 (97.7)              | 807 (98.2)              | 804 (98.5)              | 825 (96.9)              | 0.135   |
| Periprocedural antithrombotic medication |                         |                         |                         |                         |         |
| Aspirin                                  | 714 (87.5)              | 729 (88.7)              | 754 (92.4)              | 771 (90.6)              | 0.006   |
| Unfractionated heparin                   | 767 (94.0)              | 771 (93.8)              | 765 (93.8)              | 803 (94.4)              | 0.952   |
| Low-molecular-weight heparin             | 38 (4.7)                | 34 (4.1)                | 26 (3.2)                | 36 (4.2)                | 0.489   |
| Bivalirudin                              | 60 (7.4)                | 73 (8.9)                | 69 (8.5)                | 64 (7.5)                | 0.614   |
| GPIIb/IIIa inhibitor                     | 87 (10.7)               | 101 (12.3)              | 112 (13.7)              | 94 (11.0)               | 0.213   |

Abbreviations: GPIIb/IIIa, glycoprotein IIb/IIIa; LAD, left anterior descending; PCI, percutaneous coronary intervention; TIMI, Thrombolysis in Myocardial Infarction.

Note: Data are shown as counts (proportions; %) or mean  $\pm$  standard deviation.

**Supplementary Table S4** Clinical outcomes according to subgroup analyses and study drugs among platelet count quartiles

|                            | Quartile 1<br>(n = 997) |                        |                      |         | Quartile 2<br>(n = 1,003) |                        |                     |              | Quartile 3<br>(n = 961) |                        |                     |              | Quartile 4<br>(n = 982) |                        |                     |              |
|----------------------------|-------------------------|------------------------|----------------------|---------|---------------------------|------------------------|---------------------|--------------|-------------------------|------------------------|---------------------|--------------|-------------------------|------------------------|---------------------|--------------|
|                            | Ticagrelor<br>(N = 485) | Prasugrel<br>(N = 512) | HR<br>[95% CI]       | p-Value | Ticagrelor<br>(N = 500)   | Prasugrel<br>(N = 503) | HR<br>[95% CI]      | p-Value      | Ticagrelor<br>(N = 482) | Prasugrel<br>(N = 479) | HR<br>[95% CI]      | p-Value      | Ticagrelor<br>(N = 499) | Prasugrel<br>(N = 483) | HR<br>[95% CI]      | p-Value      |
| <b>≥75 y or &lt;60 kg</b>  |                         |                        |                      |         |                           |                        |                     |              |                         |                        |                     |              |                         |                        |                     |              |
| Primary endpoint           | 23/157<br>(15.0)        | 16/158<br>(10.3)       | 1.49<br>[0.79-2.83]  | 0.217   | 20/130<br>(15.4)          | 18/151<br>(12.1)       | 1.28<br>[0.68-2.42] | 0.444        | 14/123<br>(11.6)        | 12/112<br>(10.9)       | 1.06<br>[0.49-2.30] | 0.874        | 21/136<br>(15.6)        | 22/118<br>(19.0)       | 0.78<br>[0.43-1.43] | 0.426        |
| BARC 3 to 5 bleeding       | 12/155<br>(9.6)         | 9/127<br>(7.9)         | 1.20<br>[0.51-2.86]  | 0.673   | 14/128<br>(14.3)          | 6/133<br>(5.0)         | 2.82<br>[1.08-7.34] | <b>0.033</b> | 9/121<br>(8.8)          | 6/102<br>(6.8)         | 1.34<br>[0.48-3.78] | 0.574        | 10/135<br>(9.1)         | 13/99<br>(14.5)        | 0.56<br>[0.25-1.28] | 0.167        |
| <b>&lt;75 y and ≥60 kg</b> |                         |                        |                      |         |                           |                        |                     |              |                         |                        |                     |              |                         |                        |                     |              |
| Primary endpoint           | 19/326<br>(5.9)         | 16/349<br>(4.6)        | 1.28<br>[0.66-2.48]  | 0.472   | 29/369<br>(7.9)           | 11/349<br>(3.2)        | 2.58<br>[1.29-5.16] | <b>0.007</b> | 23/356<br>(6.6)         | 14/366<br>(3.9)        | 1.72<br>[0.89-3.35] | 0.109        | 29/361<br>(8.1)         | 26/363<br>(7.3)        | 1.13<br>[0.66-1.91] | 0.657        |
| BARC 3 to 5 bleeding       | 12/324<br>(4.1)         | 8/302<br>(2.7)         | 1.53<br>[0.63-3.76]  | 0.347   | 12/361<br>(3.8)           | 9/311<br>(3.3)         | 1.26<br>[0.53-3.00] | 0.594        | 9/354<br>(2.9)          | 6/329<br>(1.9)         | 1.53<br>[0.54-4.29] | 0.421        | 14/358<br>(4.4)         | 21/330<br>(6.8)        | 0.65<br>[0.33-1.27] | 0.204        |
| <b>≥75 y</b>               |                         |                        |                      |         |                           |                        |                     |              |                         |                        |                     |              |                         |                        |                     |              |
| Primary endpoint           | 23/148<br>(15.9)        | 15/149<br>(10.3)       | 1.60<br>[0.83-3.06]  | 0.157   | 18/116<br>(15.5)          | 18/134<br>(13.7)       | 1.14<br>[0.59-2.19] | 0.698        | 13/107<br>(12.4)        | 11/104<br>(10.8)       | 1.16<br>[0.52-2.58] | 0.721        | 19/112<br>(17.2)        | 22/100<br>(22.4)       | 0.71<br>[0.39-1.32] | 0.280        |
| BARC 3 to 5 bleeding       | 12/146<br>(10.1)        | 9/121<br>(8.3)         | 1.21<br>[0.51-2.88]  | 0.662   | 12/114<br>(13.5)          | 5/121<br>(4.6)         | 2.93<br>[1.03-8.32] | <b>0.043</b> | 7/106<br>(7.7)          | 5/95<br>(6.2)          | 1.34<br>[0.43-4.22] | 0.617        | 10/111<br>(10.9)        | 13/83<br>(17.3)        | 0.55<br>[0.24-1.26] | 0.158        |
| <b>&lt;75 y</b>            |                         |                        |                      |         |                           |                        |                     |              |                         |                        |                     |              |                         |                        |                     |              |
| Primary endpoint           | 19/337<br>(5.7)         | 17/363<br>(4.7)        | 1.21<br>[0.63-2.32]  | 0.570   | 31/384<br>(8.2)           | 11/369<br>(3.0)        | 2.80<br>[1.41-5.58] | <b>0.003</b> | 24/375<br>(6.5)         | 15/375<br>(4.1)        | 1.63<br>[0.85-3.10] | 0.139        | 31/387<br>(8.1)         | 26/383<br>(6.9)        | 1.19<br>[0.71-2.00] | 0.516        |
| BARC 3 to 5 bleeding       | 12/335<br>(4.0)         | 8/313<br>(2.7)         | 1.54<br>[0.63-3.78]  | 0.341   | 14/376<br>(4.4)           | 10/326<br>(3.4)        | 1.34<br>[0.60-3.03] | 0.476        | 11/372<br>(3.4)         | 7/337<br>(2.2)         | 1.56<br>[0.60-4.02] | 0.359        | 14/384<br>(4.1)         | 21/348<br>(6.4)        | 0.64<br>[0.33-1.26] | 0.196        |
| <b>Women</b>               |                         |                        |                      |         |                           |                        |                     |              |                         |                        |                     |              |                         |                        |                     |              |
| Primary endpoint           | 4/55<br>(7.3)           | 4/74<br>(5.5)          | 1.39<br>[0.35-5.57]  | 0.639   | 8/109<br>(7.4)            | 8/102<br>(7.9)         | 0.93<br>[0.35-2.48] | 0.883        | 10/133<br>(7.7)         | 12/120<br>(10.1)       | 0.76<br>[0.33-1.75] | 0.517        | 18/170<br>(10.7)        | 15/175<br>(8.7)        | 1.25<br>[0.63-2.48] | 0.527        |
| BARC 3 to 5 bleeding       | 6/54<br>(12.3)          | 1/53<br>(1.9)          | 7.17<br>[0.86-59.59] | 0.068   | 9/105<br>(13.1)           | 5/82<br>(7.2)          | 1.82<br>[0.61-5.45] | 0.282        | 8/132<br>(7.6)          | 8/98<br>(8.9)          | 0.82<br>[0.31-2.19] | 0.691        | 11/169<br>(7.9)         | 19/147<br>(14.4)       | 0.54<br>[0.26-1.13] | 0.102        |
| <b>Men</b>                 |                         |                        |                      |         |                           |                        |                     |              |                         |                        |                     |              |                         |                        |                     |              |
| Primary endpoint           | 38/430<br>(8.9)         | 28/438<br>(6.5)        | 1.40<br>[0.86-2.28]  | 0.179   | 41/391<br>(10.6)          | 21/401<br>(5.3)        | 2.06<br>[1.22-3.49] | <b>0.007</b> | 27/349<br>(7.8)         | 14/359<br>(4.0)        | 2.01<br>[1.06-3.85] | <b>0.033</b> | 32/329<br>(9.8)         | 33/308<br>(10.9)       | 0.89<br>[0.55-1.45] | 0.641        |
| BARC 3 to 5 bleeding       | 18/427<br>(5.0)         | 16/381<br>(4.5)        | 1.09<br>[0.56-2.14]  | 0.797   | 17/385<br>(5.0)           | 10/365<br>(3.0)        | 1.73<br>[0.79-3.77] | 0.171        | 10/346<br>(3.3)         | 4/334<br>(1.3)         | 2.60<br>[0.82-8.30] | 0.106        | 13/326<br>(4.5)         | 15/284<br>(5.5)        | 0.78<br>[0.37-1.64] | 0.512        |
| <b>Smoker</b>              |                         |                        |                      |         |                           |                        |                     |              |                         |                        |                     |              |                         |                        |                     |              |
| Primary endpoint           | 9/129<br>(7.1)          | 9/146<br>(6.2)         | 1.14<br>[0.45-2.87]  | 0.784   | 14/158<br>(8.9)           | 9/159<br>(5.7)         | 1.62<br>[0.70-3.75] | 0.258        | 9/176<br>(5.2)          | 7/158<br>(4.5)         | 1.17<br>[0.43-3.13] | 0.759        | 14/200<br>(7.1)         | 16/192<br>(8.4)        | 0.84<br>[0.41-1.72] | 0.638        |
| BARC 3 to 5 bleeding       | 3/127<br>(2.5)          | 5/133<br>(3.9)         | 0.65<br>[0.16-2.71]  | 0.553   | 11/155<br>(8.5)           | 3/151<br>(2.2)         | 3.97<br>[1.11-14.2] | <b>0.034</b> | 5/176<br>(3.2)          | 6/147<br>(4.3)         | 0.76<br>[0.23-2.48] | 0.644        | 7/199<br>(4.0)          | 18/179<br>(10.4)       | 0.35<br>[0.15-0.85] | <b>0.020</b> |
| <b>Nonsmoker</b>           |                         |                        |                      |         |                           |                        |                     |              |                         |                        |                     |              |                         |                        |                     |              |
| Primary endpoint           | 32/354<br>(9.1)         | 22/362<br>(6.2)        | 1.51<br>[0.88-2.61]  | 0.134   | 35/342<br>(10.3)          | 20/344<br>(5.9)        | 1.79<br>[1.03-3.09] | <b>0.038</b> | 27/304<br>(9.0)         | 19/319<br>(6.1)        | 1.51<br>[0.84-2.72] | 0.165        | 35/294<br>(12.0)        | 31/290<br>(10.9)       | 1.09<br>[0.68-1.78] | 0.712        |
| BARC 3 to 5 bleeding       | 20/352<br>(6.8)         | 12/297<br>(4.3)        | 1.59<br>[0.78-3.25]  | 0.204   | 15/335<br>(5.3)           | 12/296<br>(4.5)        | 1.23<br>[0.57-2.62] | 0.599        | 12/300<br>(4.7)         | 6/283<br>(2.2)         | 2.05<br>[0.77-5.47] | 0.150        | 17/291<br>(6.8)         | 15/251<br>(6.7)        | 1.04<br>[0.52-2.09] | 0.905        |

Supplementary Table S4 (Continued)

|                      | Quartile 1<br>(n = 957) |                        |                     | Quartile 2<br>(n = 1,003) |                         |                        | Quartile 3<br>(n = 961) |              |                         | Quartile 4<br>(n = 982) |                     |         |                         |                        |                     |              |
|----------------------|-------------------------|------------------------|---------------------|---------------------------|-------------------------|------------------------|-------------------------|--------------|-------------------------|-------------------------|---------------------|---------|-------------------------|------------------------|---------------------|--------------|
|                      | Ticagrelor<br>(N = 485) | Prasugrel<br>(N = 512) | HR<br>[95% CI]      | p-Value                   | Ticagrelor<br>(N = 500) | Prasugrel<br>(N = 503) | HR<br>[95% CI]          | p-Value      | Ticagrelor<br>(N = 482) | Prasugrel<br>(N = 479)  | HR<br>[95% CI]      | p-Value | Ticagrelor<br>(N = 499) | Prasugrel<br>(N = 483) | HR<br>[95% CI]      | p-Value      |
| <b>Diabetes</b>      |                         |                        |                     |                           |                         |                        |                         |              |                         |                         |                     |         |                         |                        |                     |              |
| Primary endpoint     | 13/117<br>(11.3)        | 13/138<br>(9.5)        | 1.22<br>[0.57–2.63] | 0.614                     | 13/114<br>(11.5)        | 11/105<br>(10.7)       | 1.09<br>[0.49–2.44]     | 0.828        | 12/103<br>(11.9)        | 10/85<br>(11.9)         | 0.99<br>[0.43–2.30] | 0.984   | 12/117<br>(10.4)        | 21/99<br>(21.9)        | 0.45<br>[0.22–0.91] | <b>0.026</b> |
| BARC 3 to 5 bleeding | 5/114<br>(5.4)          | 3/120<br>(2.8)         | 2.03<br>[0.48–8.50] | 0.333                     | 4/111<br>(4.6)          | 2/92<br>(2.4)          | 1.85<br>[0.34–10.1]     | 0.477        | 8/101<br>(8.6)          | 3/80<br>(4.1)           | 2.19<br>[0.58–8.25] | 0.248   | 9/117<br>(8.6)          | 11/89<br>(13.9)        | 0.64<br>[0.27–1.55] | 0.325        |
| <b>Nondiabetics</b>  |                         |                        |                     |                           |                         |                        |                         |              |                         |                         |                     |         |                         |                        |                     |              |
| Primary endpoint     | 29/368<br>(8.0)         | 19/374<br>(5.1)        | 1.56<br>[0.88–2.79] | 0.130                     | 36/386<br>(9.4)         | 18/398<br>(4.6)        | 2.11<br>[1.20–3.72]     | <b>0.009</b> | 25/379<br>(6.7)         | 16/394<br>(4.1)         | 1.65<br>[0.88–3.09] | 0.117   | 38/382<br>(10.1)        | 26/383<br>(6.9)        | 1.48<br>[0.90–2.44] | 0.122        |
| BARC 3 to 5 bleeding | 19/367<br>(5.9)         | 14/314<br>(4.7)        | 1.26<br>[0.63–2.51] | 0.511                     | 22/379<br>(6.9)         | 13/355<br>(4.1)        | 1.76<br>[0.89–3.49]     | 0.107        | 10/377<br>(3.2)         | 9/352<br>(2.7)          | 1.14<br>[0.46–2.81] | 0.773   | 15/378<br>(4.6)         | 22/341<br>(6.8)        | 0.65<br>[0.33–1.24] | 0.191        |

Abbreviations: BARC, Bleeding Academic Research Consortium; CI, confidence interval; HR, hazard ratio.

Note: The analysis was performed in selected prespecified subgroups, where the number of patients allowed for it in all quartiles. Statistically significant p-values are denoted in bold.
